# Supplementary material
Source: MDPI journal article supplement (https://www.mdpi.com/2076-3263/8/7/244)
Supplement: s1 [file s1]

Archive with 3 entries (3 files):
- Supplemental1.pdf
- Suuplemental2.pdf
- Suuplemental3.pdf
