# Supplementary material
Source: MDPI journal article supplement (https://www.mdpi.com/2076-3263/8/7/244)
Supplement: s1 [file s1 › Supplemental1.pdf]

## Supplemental 1: Data sets

Buscombe & Ritchie. "Landscape classification with deep neural networks."

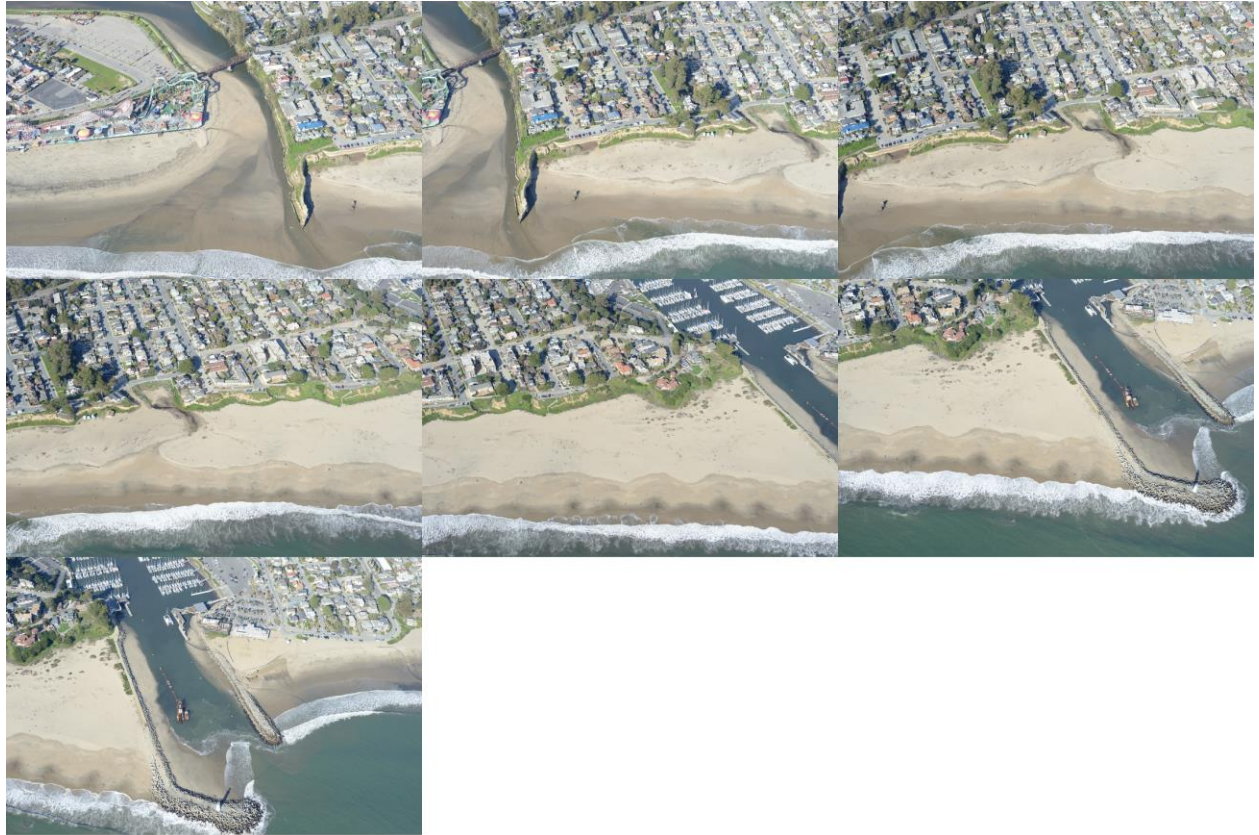

**Figure S1A.** Seabright training images.

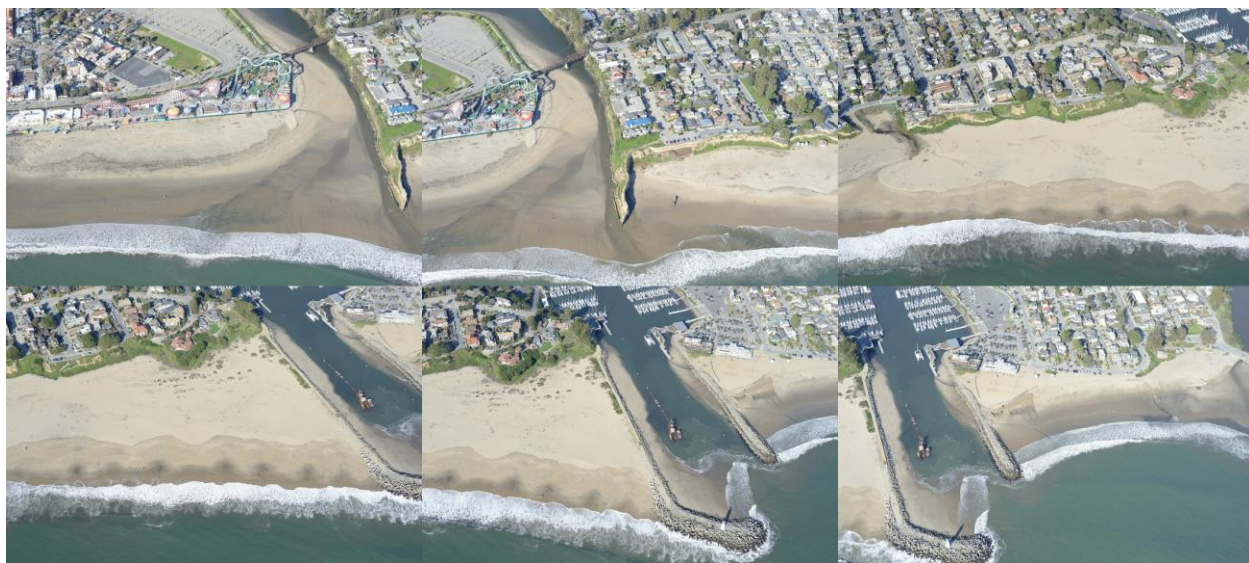

**Figure S1B.** Seabright test images.

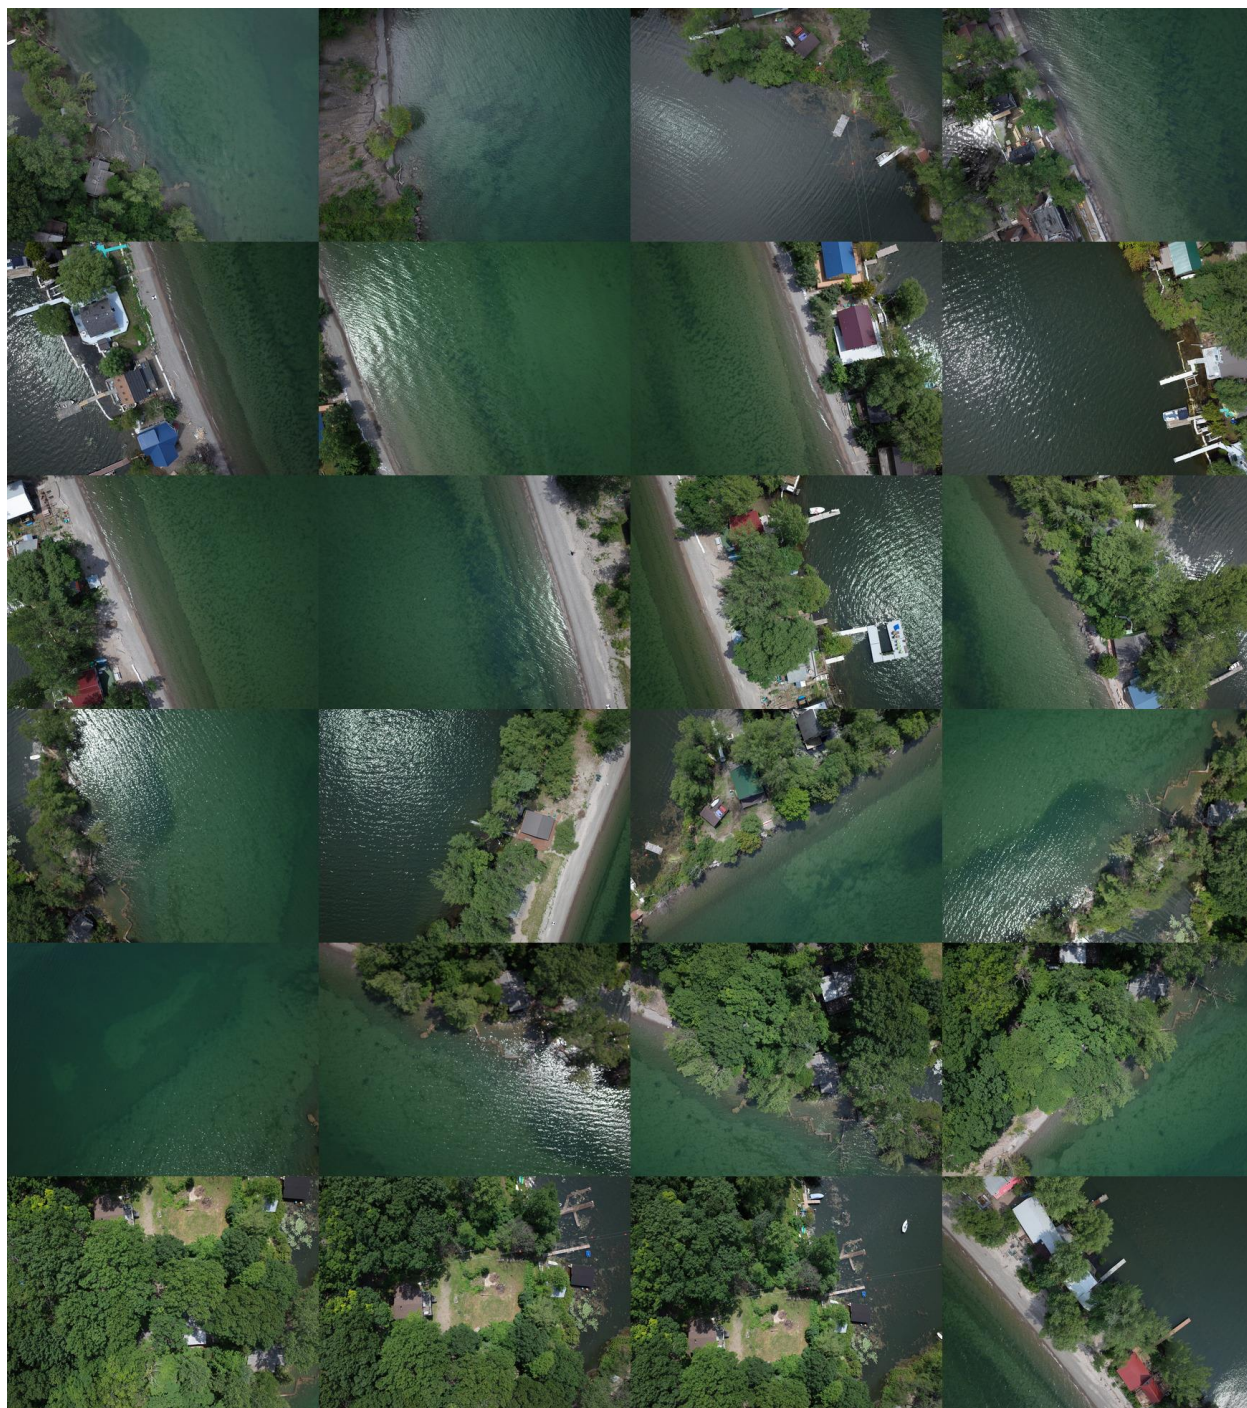

**Figure S1C.** Lake Ontario training images.

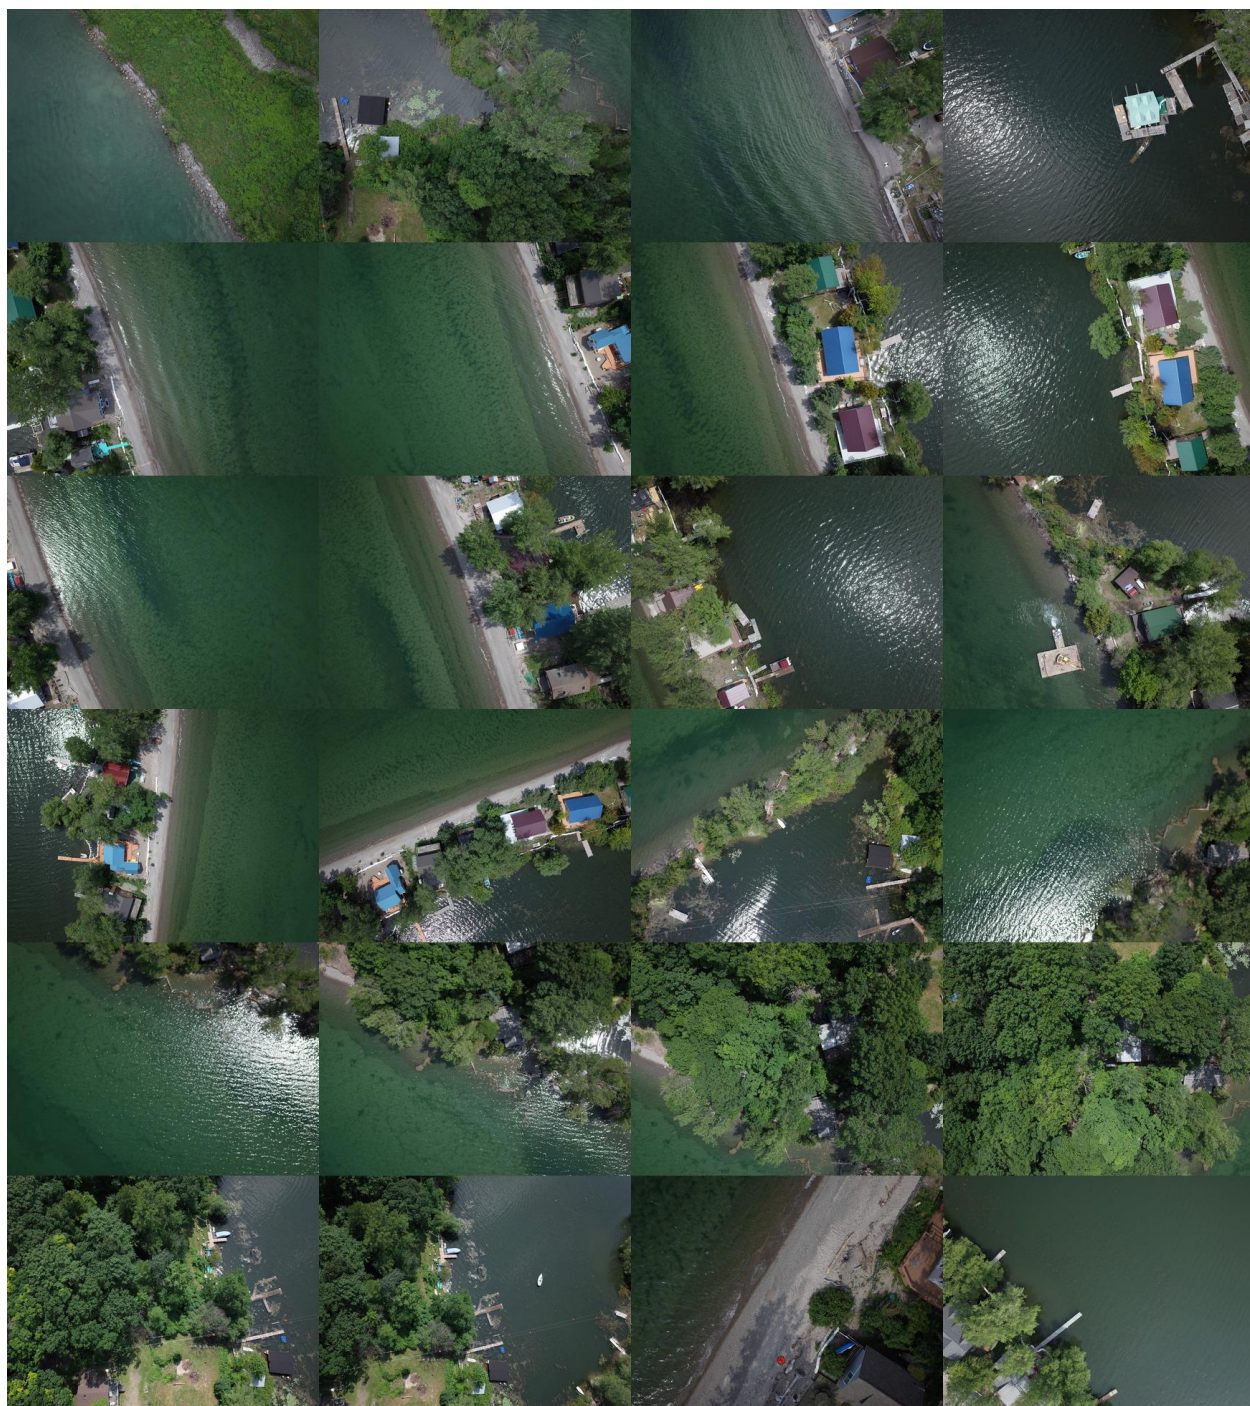

Figure S1D. Lake Ontario test images.

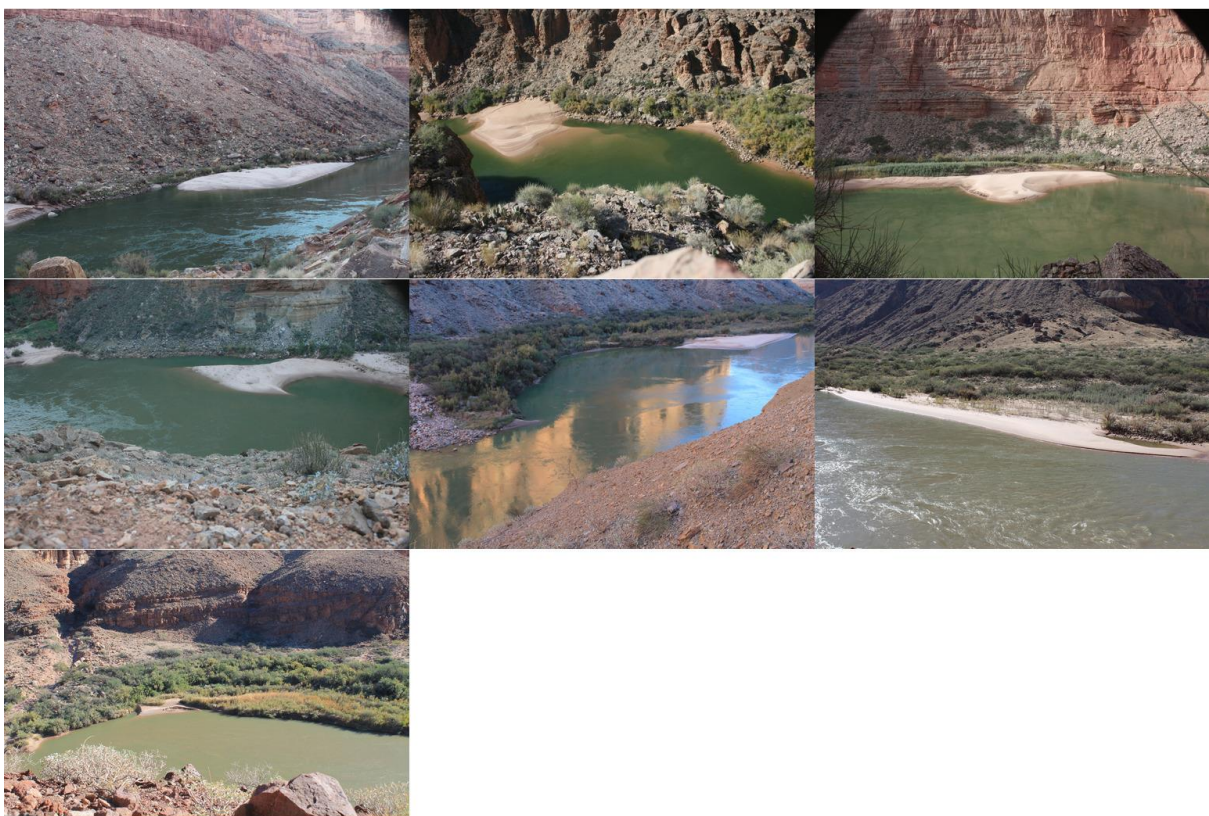

**Figure S1E.** Grand Canyon training images.

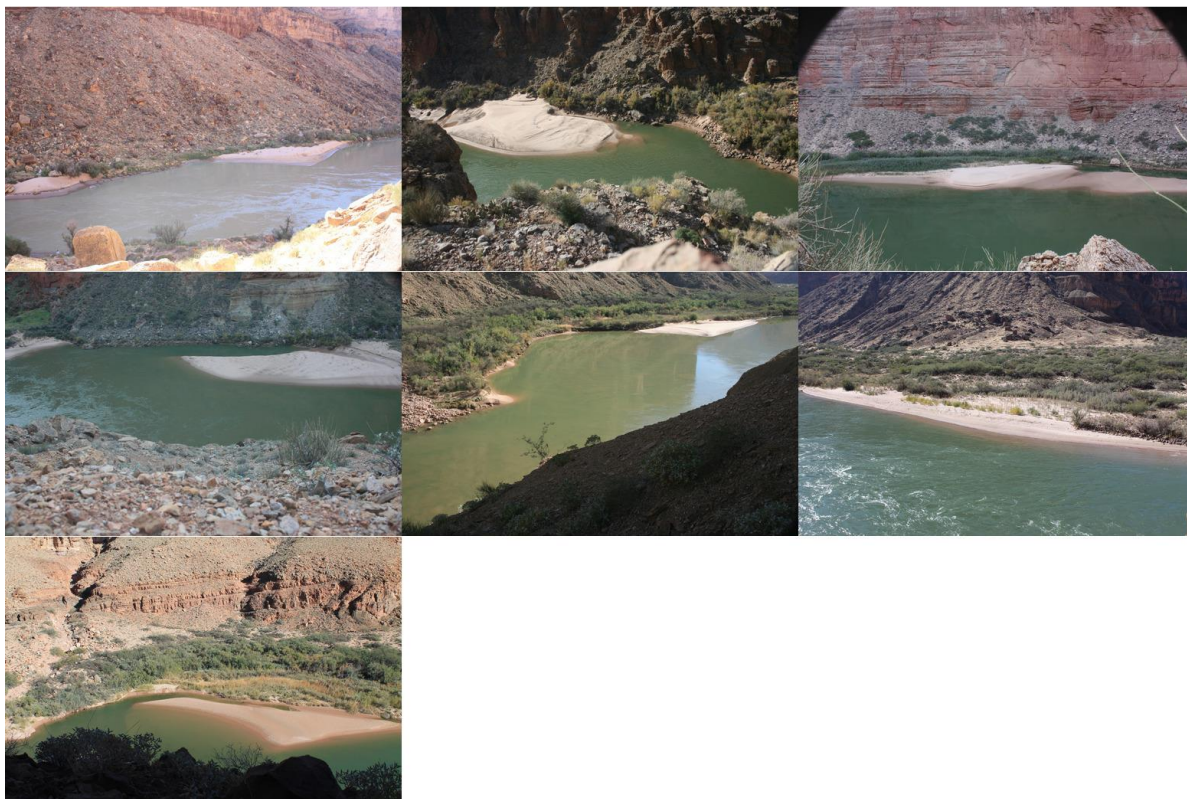

**Figure S1F.** Grand Canyon test images.

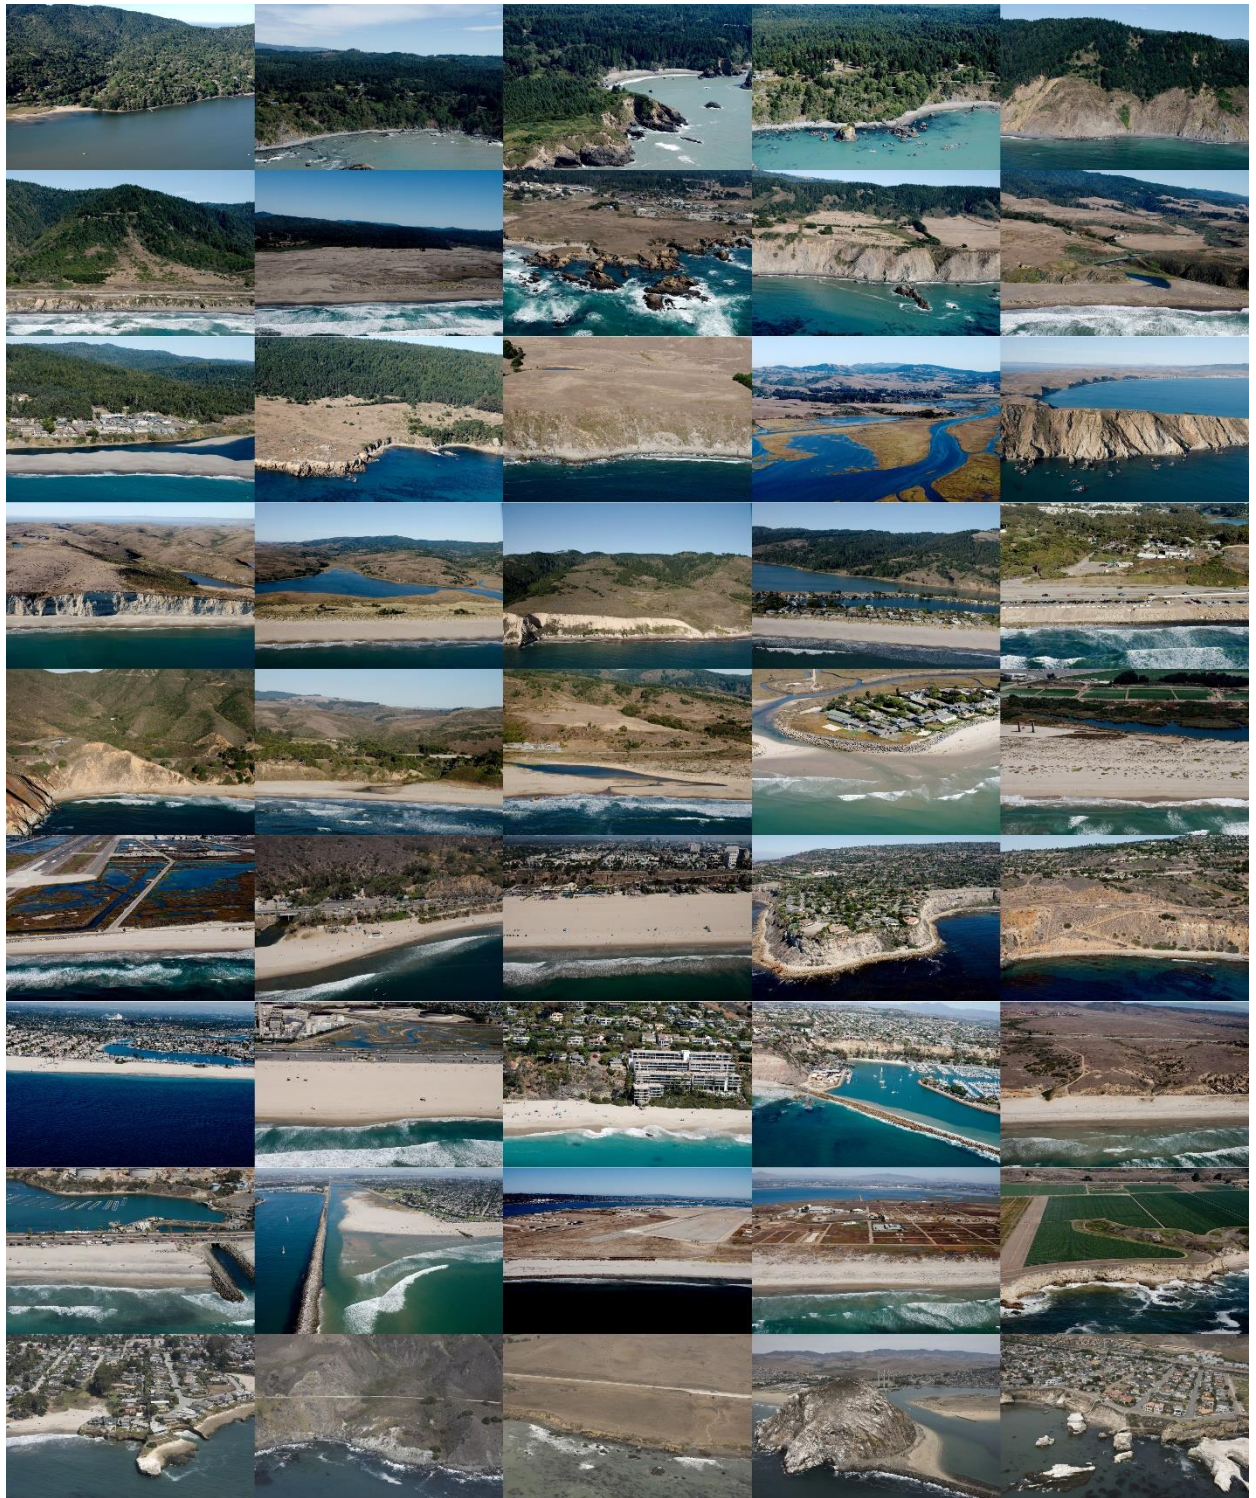

**Figure S1G.** California Coastal Records training images. Copyright (C) 2002-2018 Kenneth & Gabrielle Adelman, [www.Californiacoastline.org](http://www.Californiacoastline.org).

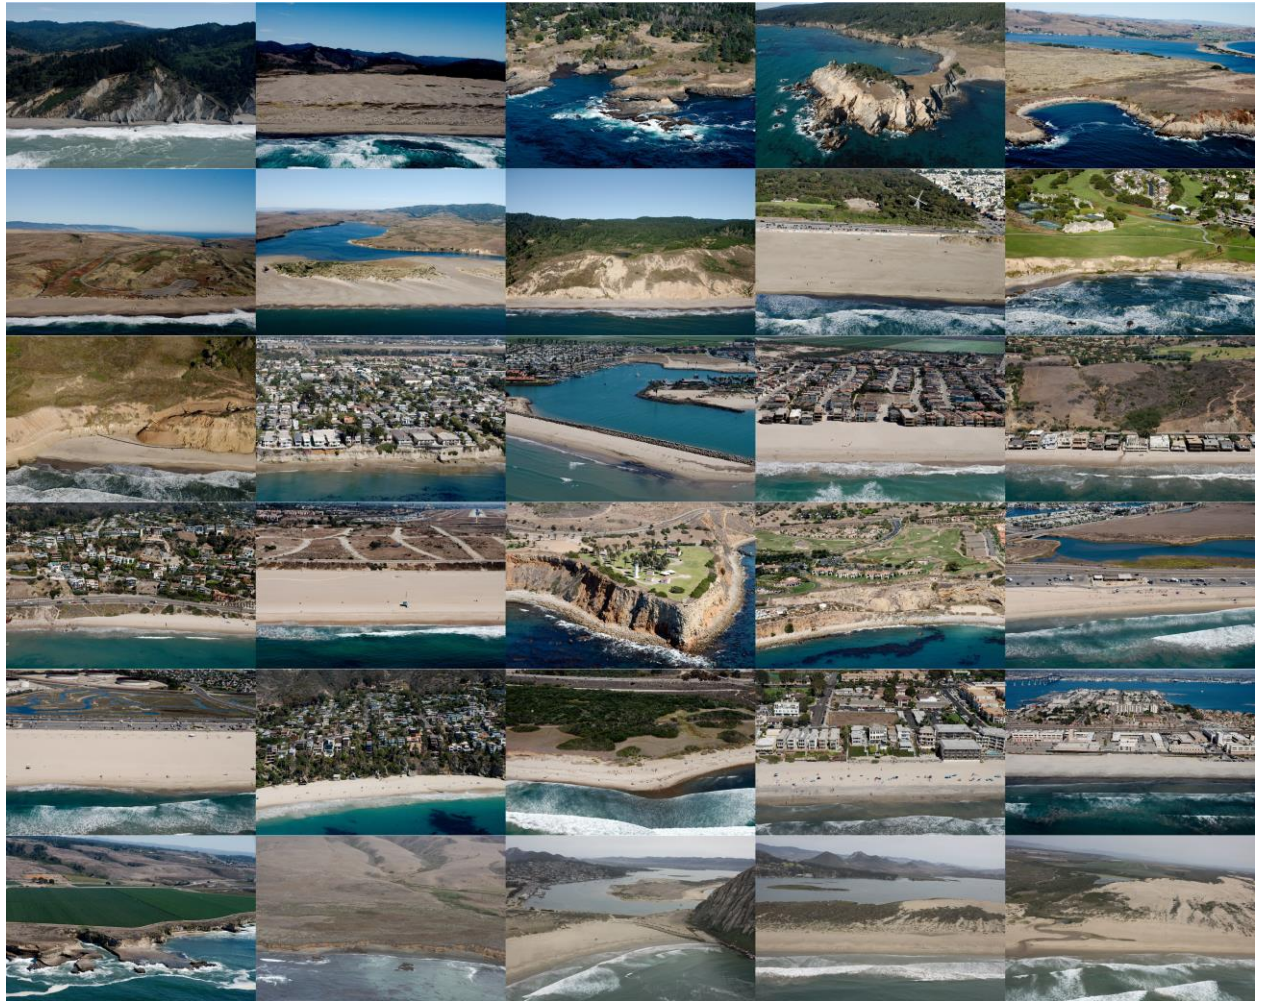

**Figure S1H.** California Coastal Records test images. Copyright (C) 2002-2018 Kenneth & Gabrielle Adelman, [www.Californiacoastline.org](http://www.Californiacoastline.org).
