# Supplementary material
Source: MDPI journal article supplement (https://www.mdpi.com/2076-3263/8/7/244)
Supplement: s1 [file s1 › Suuplemental3.pdf]

### Supplemental 3: DCNN-CRF classifications

Buscombe & Ritchie. "Landscape classification with deep neural networks."

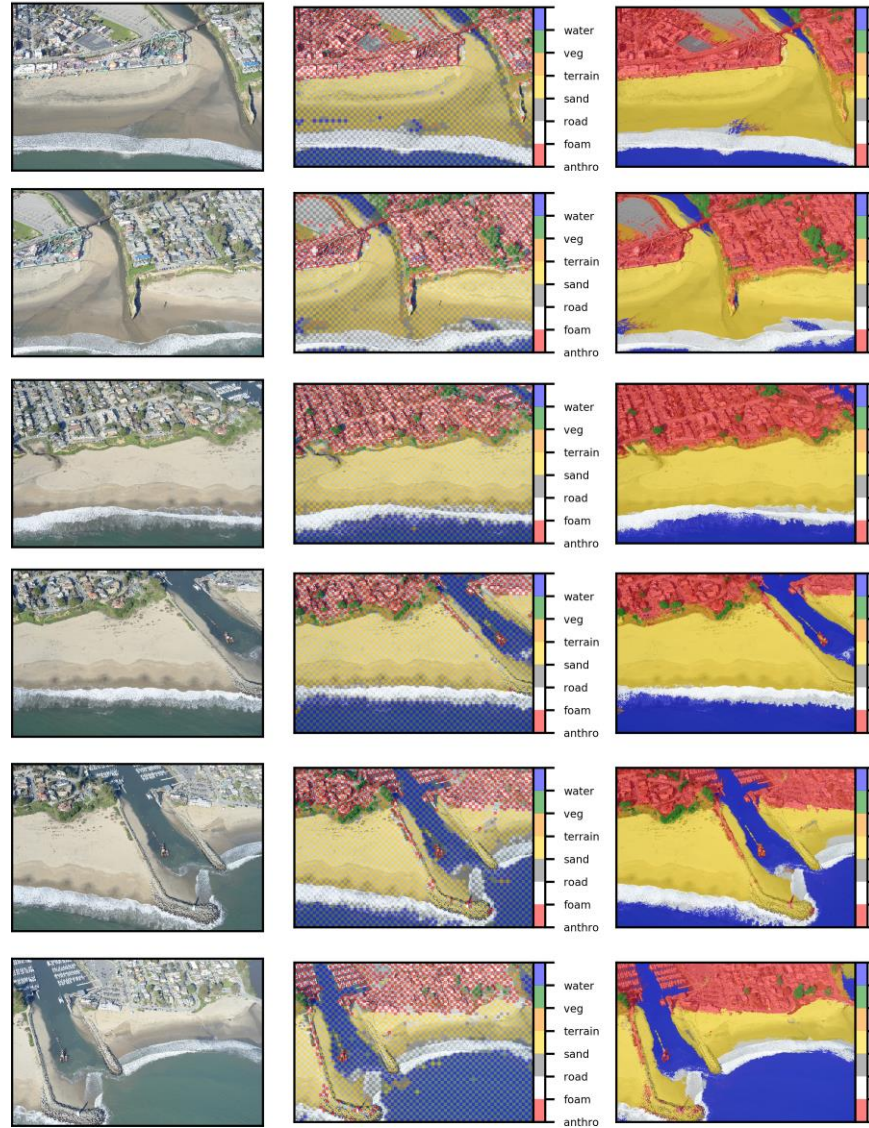

Figure S3A. Seabright

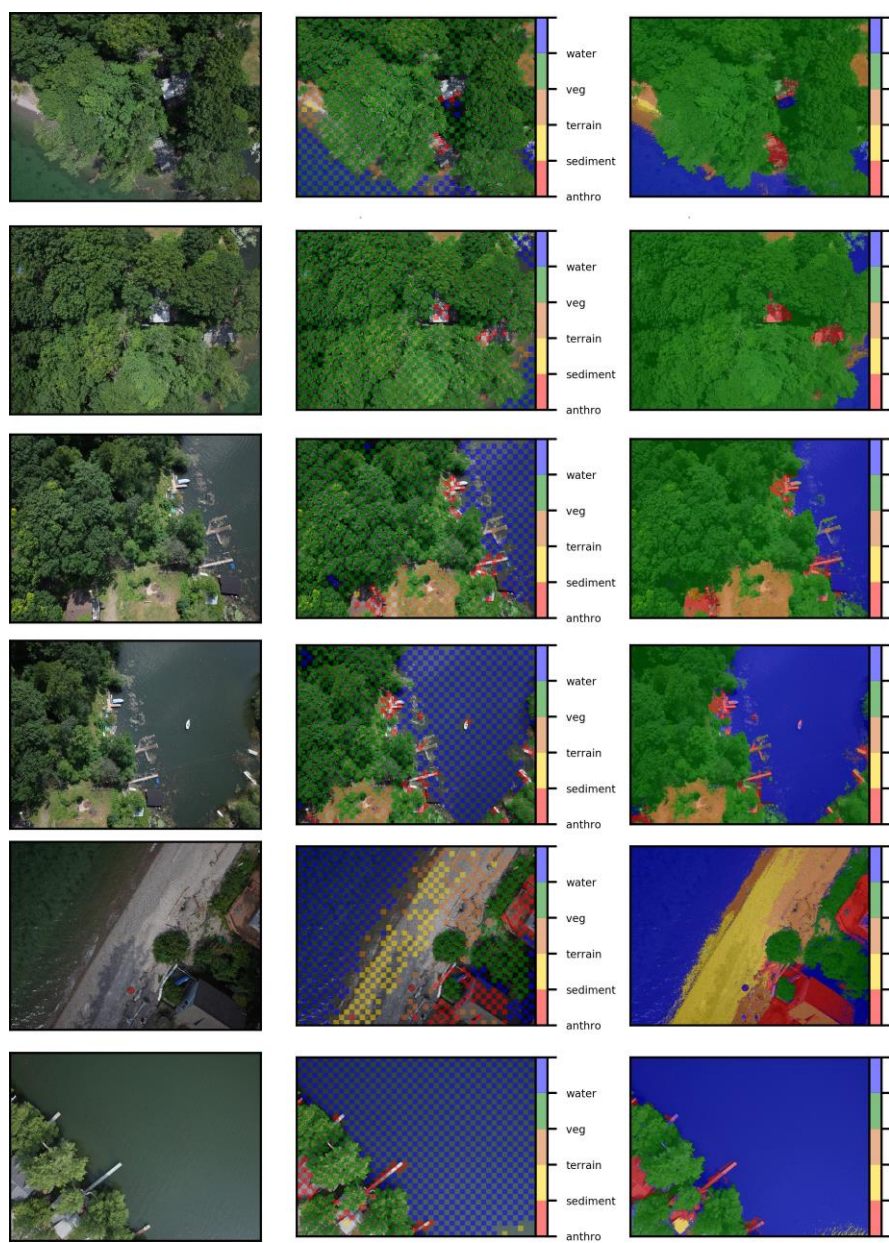

**Figure S3B.** Ontario, set 1 of 4.

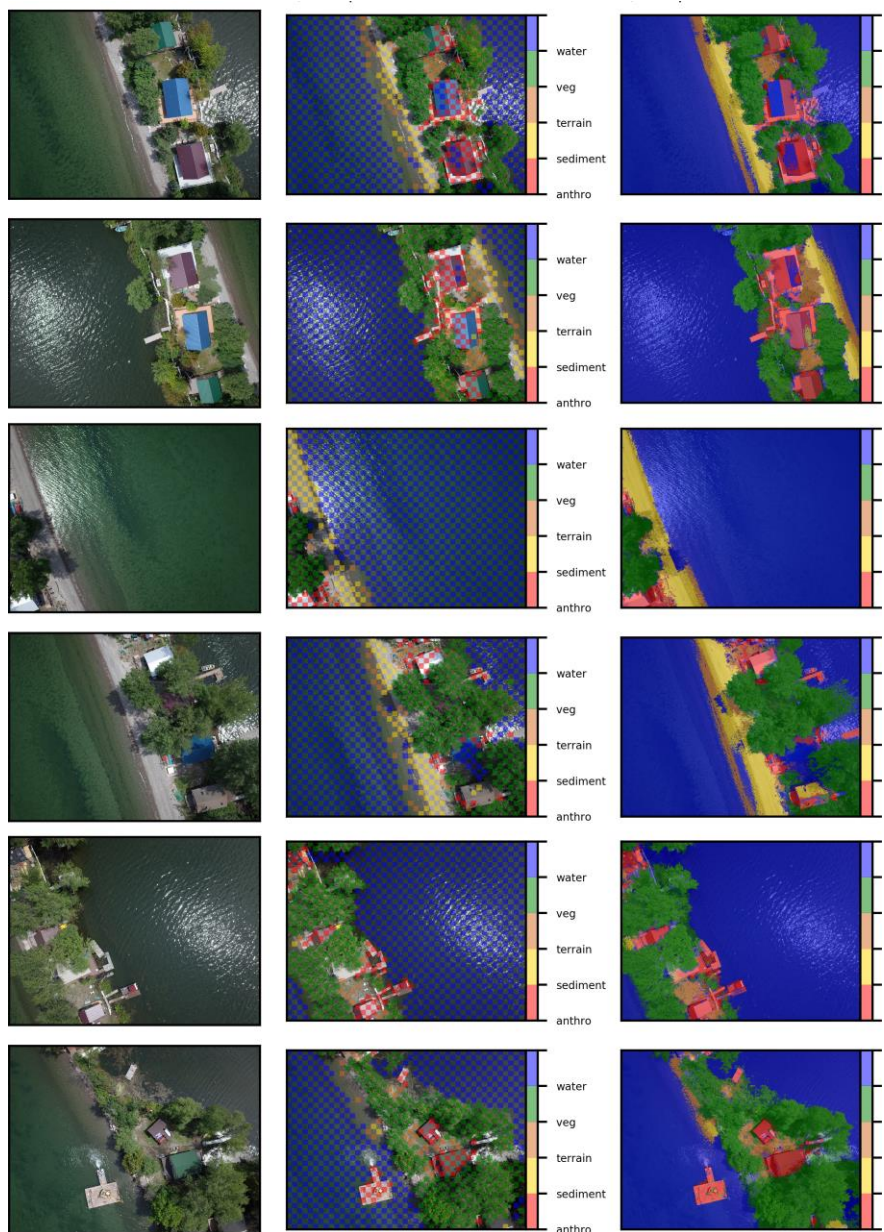

Figure S3C. Ontario, set 2 of 4.

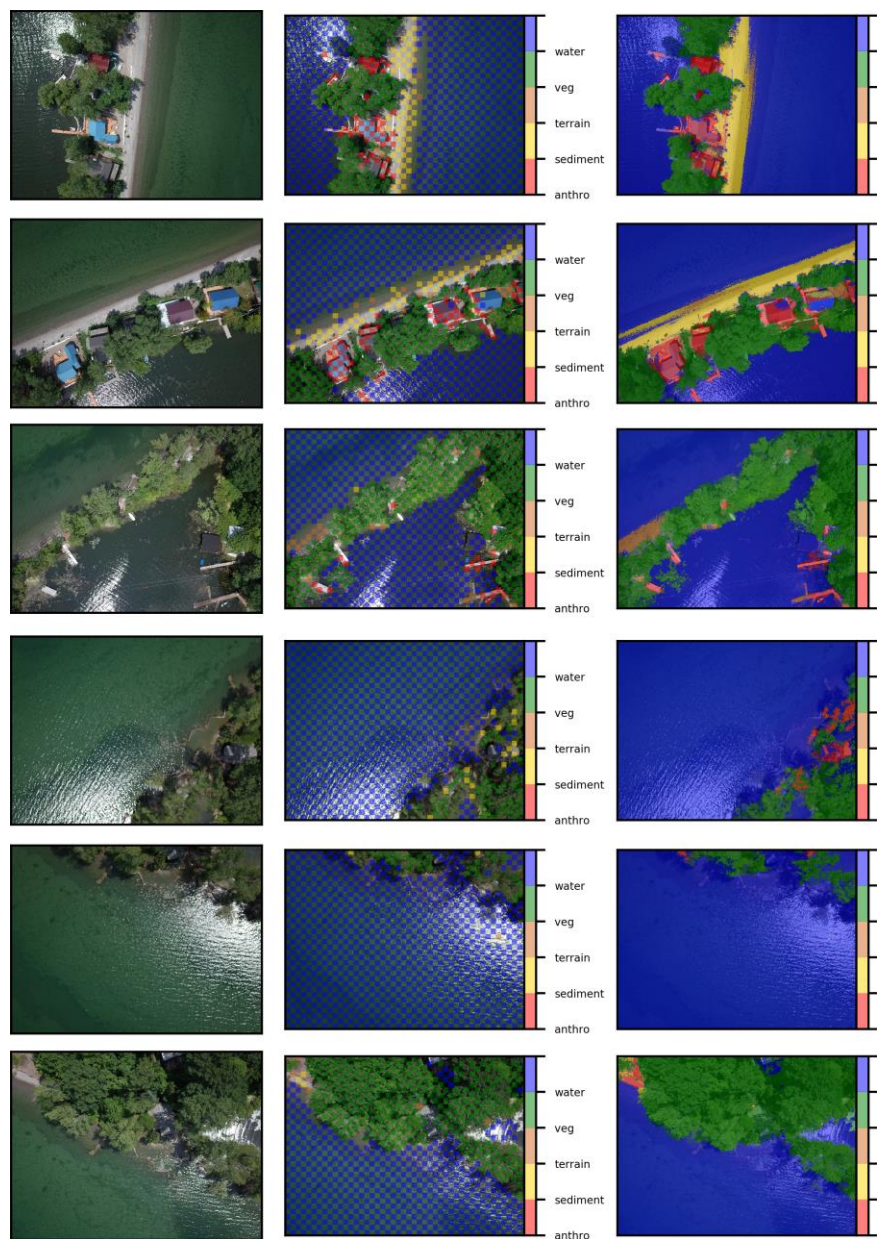

Figure S3D. Ontario, set 3 of 4.

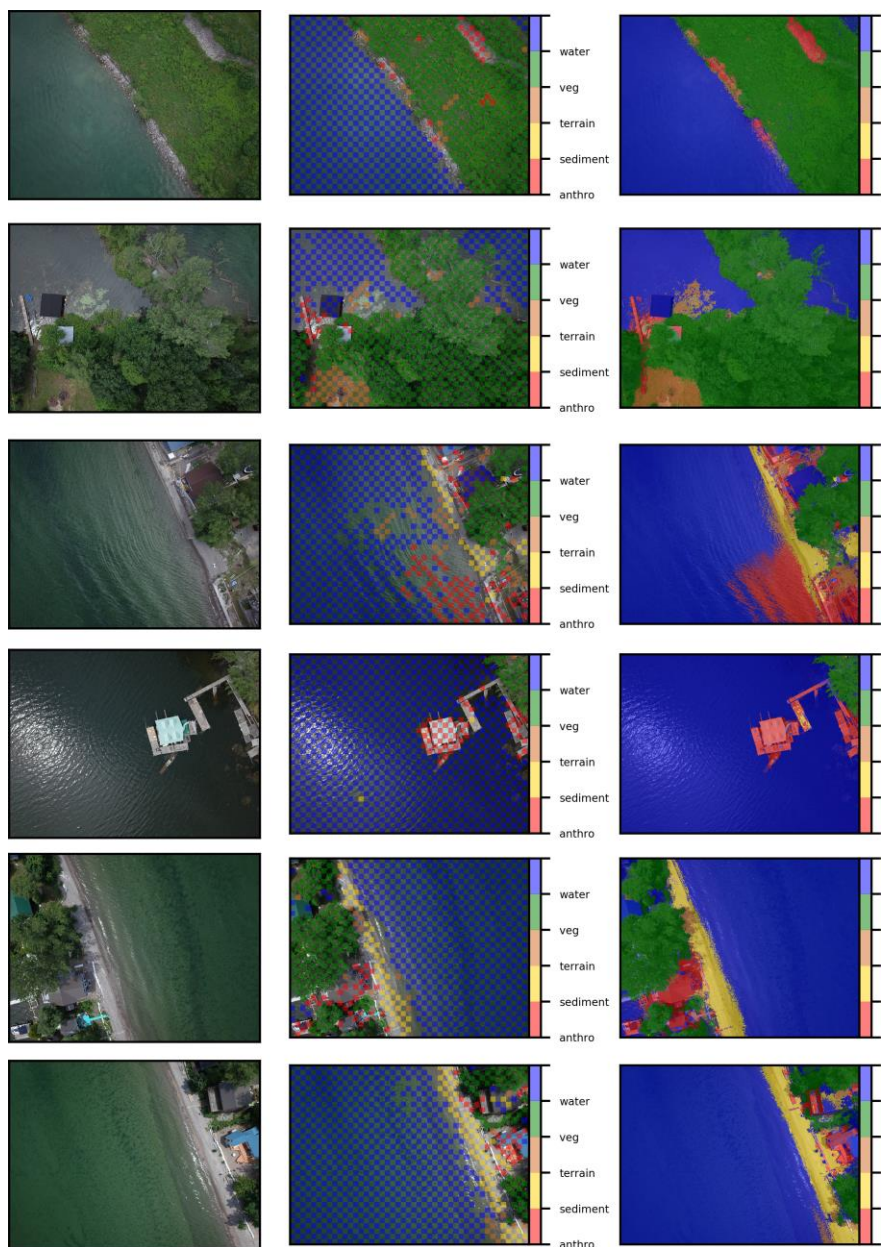

**Figure S3E.** Ontario, set 4 of 4.

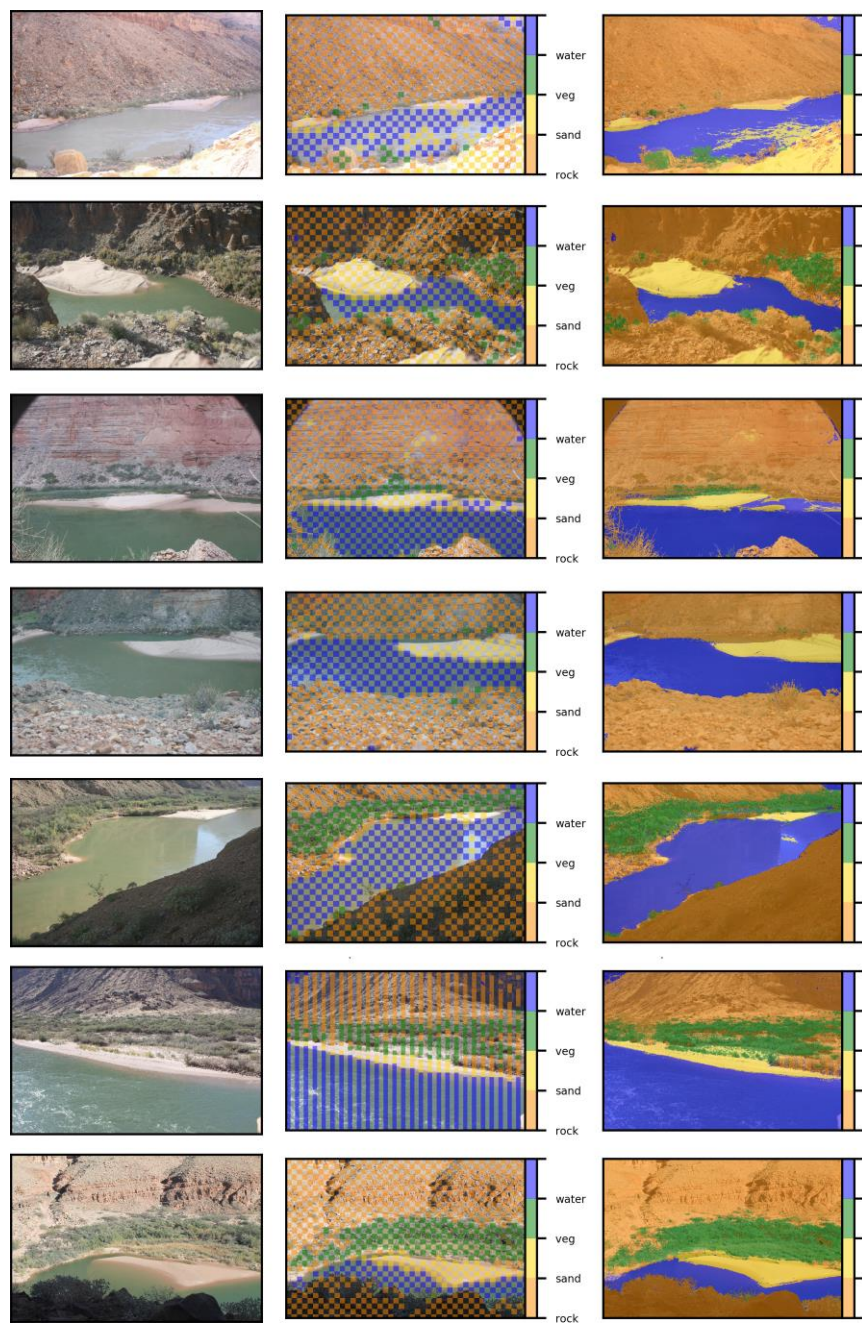

**Figure S3F.** Grand Canyon.

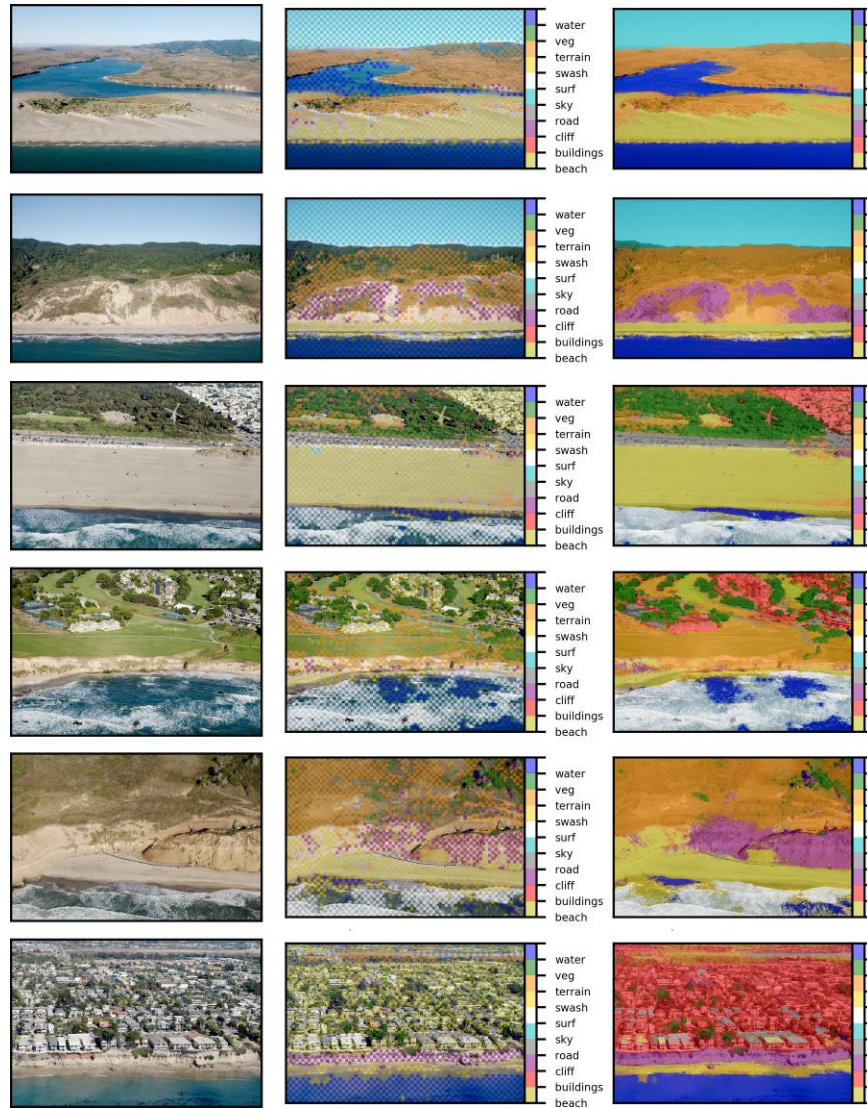

Figure S3G. CCRP, set 1 of 5.

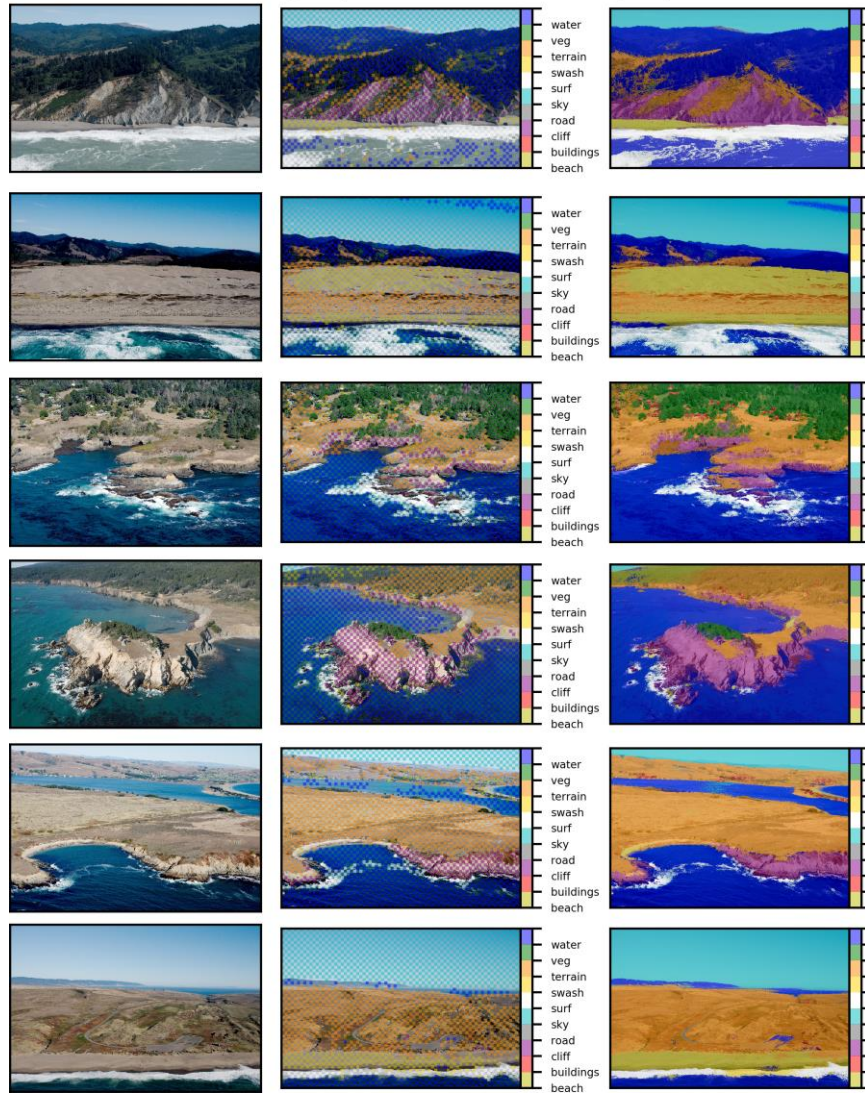

Figure S3H. CCRP, set 2 of 5.

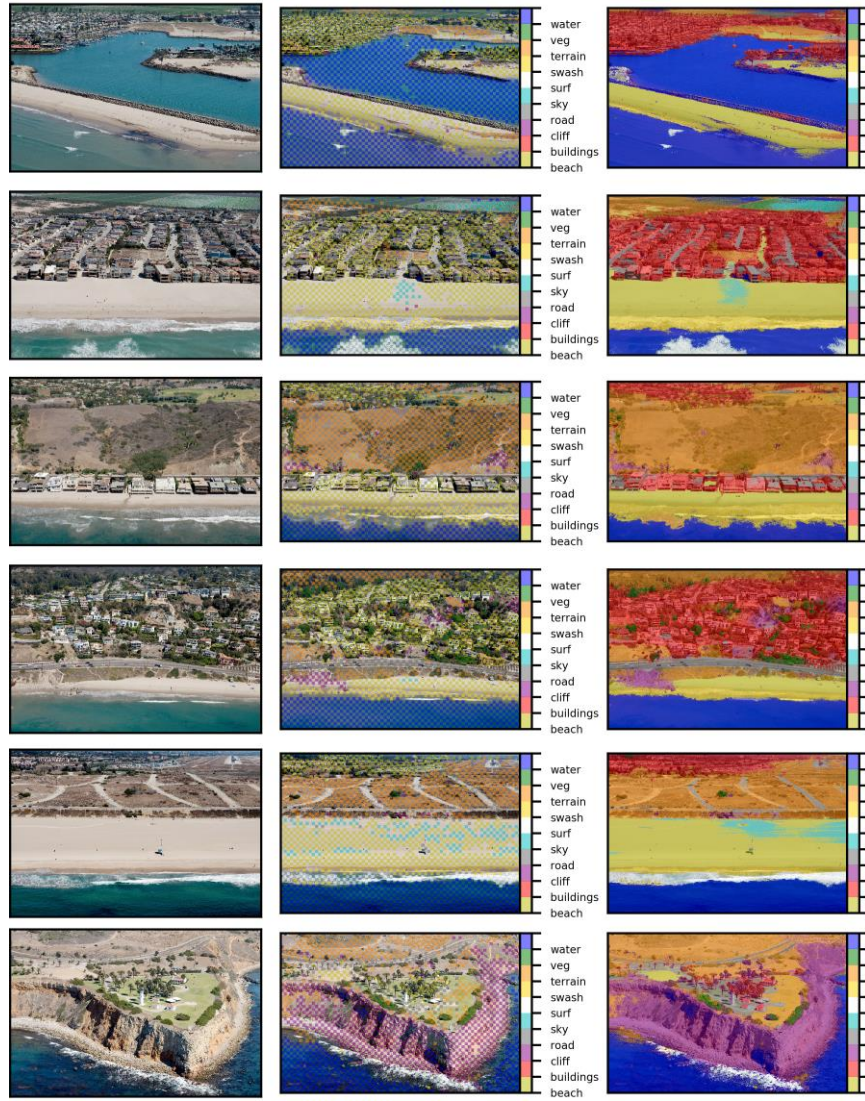

Figure S3I. CCRP, set 3 of 5.

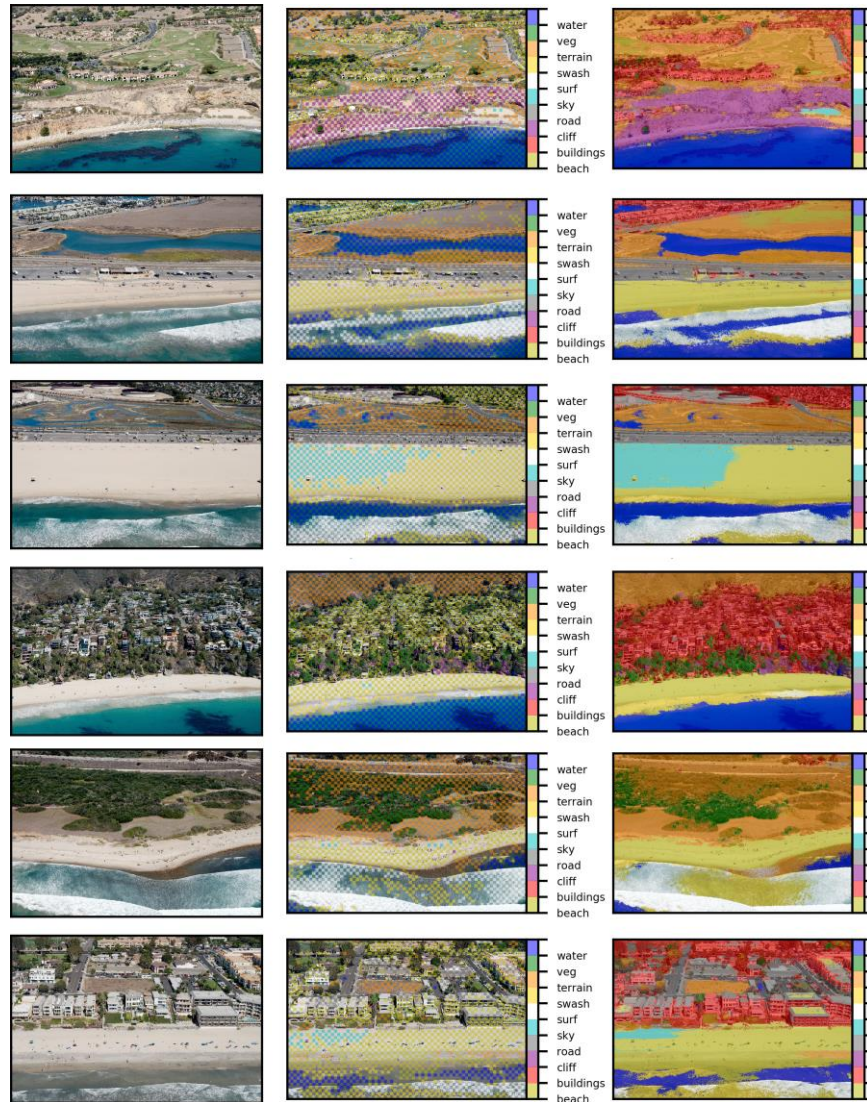

**Figure S3J.** CCRP, set 4 of 5.

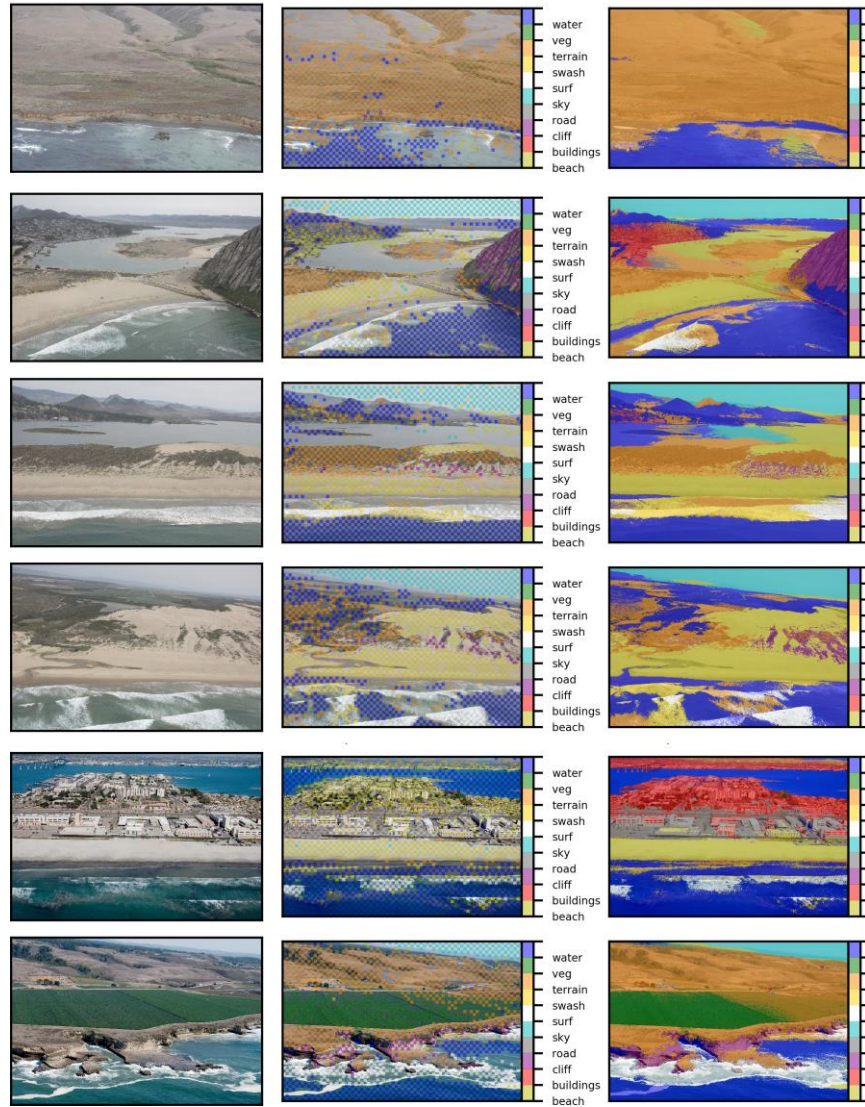

Figure S3K. CCRP, set 5 of 5.
